# Supplementary material
Source: publisher site journal article supplement (https://www.dovepress.com/get_supplementary_file.php?f=384605.docx)
Supplement: Supplementary file 1 [file get_supplementary_file.php]

**Appendix S1:** Explanation of matching without replacement in calendar date order

**Appendix S2:** Directed acyclic graphs (DAGs) of the implicitly assumed causal relationships between atopic eczema/psoriasis and severe mental illness, and explanation of the variables included in the DAGs.

**Appendix S3:** Variable definitions

**Appendix S4:** Testing the proportional hazards assumption using Schoenfeld residual plots

**Appendix S5:** Secondary analyses

**References**

**Table S1:** Description of sensitivity analyses, and HR (95% CI) of sensitivity analyses

**Table S2:** Person-time under follow-up in atopic eczema and psoriasis cohorts broken down by individual-level characteristics and atopic eczema or psoriasis exposure status.

**Table S3:** Characteristics of the atopic eczema study population at cohort entry, for: the overall cohort, individuals included in the model additionally adjusting for potential confounders (i.e., individuals with no missing Carstairs deprivation data), individuals with missing Carstairs data, individuals included in the model additionally adjusting for potential mediators (i.e., individuals with no missing BMI or smoking status data), and for individuals with missing BMI or smoking status.

**Table S4:** Characteristics of the psoriasis study population at cohort entry, for: the overall cohort, individuals included in the model additionally adjusting for potential confounders (i.e., individuals with no missing Carstairs deprivation data), individuals with missing Carstairs data, individuals included in the model additionally adjusting for potential mediators (i.e., individuals with no missing BMI or smoking status data), and for individuals with missing BMI or smoking status.

**Table S5:** Absolute incidence rates and rate differences of severe mental illness in atopic eczema and psoriasis cohorts

**Table S6:** HRs (95% CI) for the association between atopic eczema or psoriasis severity and severe mental illness.

**Table S7:** Adjusted hazard ratios (95% CIs) for the association between atopic eczema or psoriasis and severe mental illness, stratified by sex, age, and calendar period (adjusted for calendar period and Carstairs deprivation).

**Table S8:** Effects of individual mediators on the associations between atopic eczema or psoriasis and severe mental illness

**Appendix S1 – Explanation of matching without replacement in calendar date order**

In this study, we matched adults with atopic eczema or psoriasis (on age, sex, and general practice) with up to five adults without atopic eczema or psoriasis without replacement and in calendar date order.

Matching without replacement means that each of the up to five adults without atopic eczema or psoriasis were matched to only one adult with atopic eczema or psoriasis. This contrasts to matching with replacement, where the matched comparators (i.e., those without atopic eczema or psoriasis) could be matched to multiple individuals with atopic eczema or psoriasis. Matching with replacement allows sample size to be maximised as fewer exposed people (those with atopic eczema or psoriasis) are excluded because of lack of comparators and a high matching ratio can be ensured. However, as we had a large pool of eligible comparators (and were consequently not limited by sample size considerations, and able to preserve our matching ratio), we were not limited to matching with replacement. We chose to match without replacement as matching with replacement can result in substantial reuse of comparators meaning that standard errors become too optimistic and confidence intervals artificially narrow.

By ‘matching in calendar date order’ we mean that unexposed individuals (those without atopic eczema or psoriasis) in the matched cohort were assigned first to exposed individuals with the earliest cohort entry. Matching in calendar date order avoids some time-related bias.

**Appendix S2 – Directed acyclic graphs (DAGs) of the implicitly assumed causal relationships between atopic eczema/psoriasis and severe mental illness, and explanation of the variables included in the DAGs**

Simplified directed acyclic graph of the implicitly assumed causal relationship between atopic eczema and severe mental illness, true relationships between variables are likely to be more complex


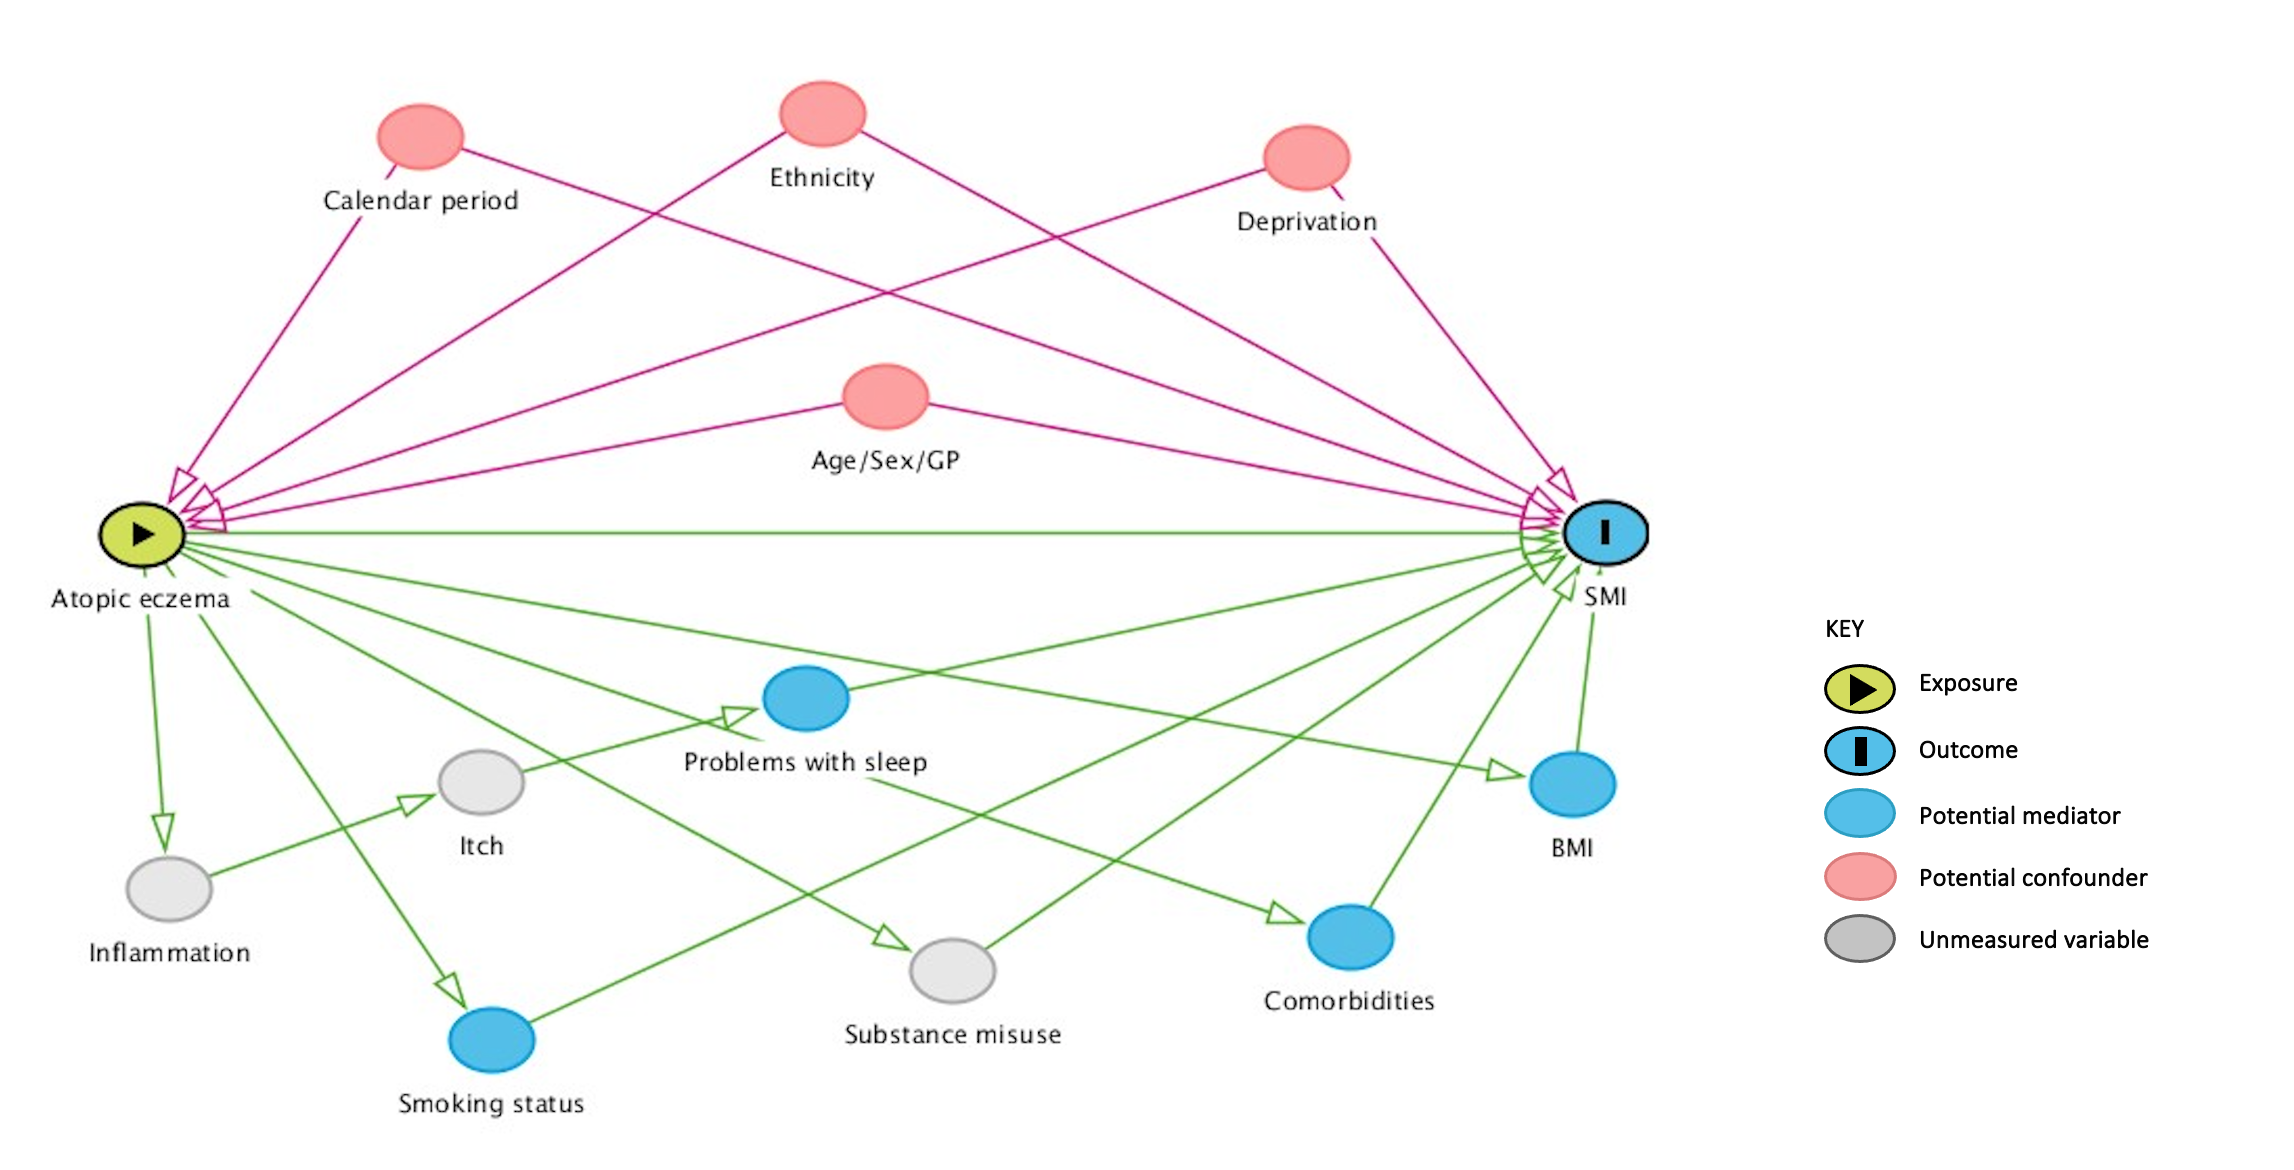


Abbreviations – BMI: Body mass index; GP: General practice; SMI: Severe mental illness

Simplified directed acyclic graph of the implicitly assumed causal relationship between psoriasis and severe mental illness, true relationships between variables are likely to be more complex


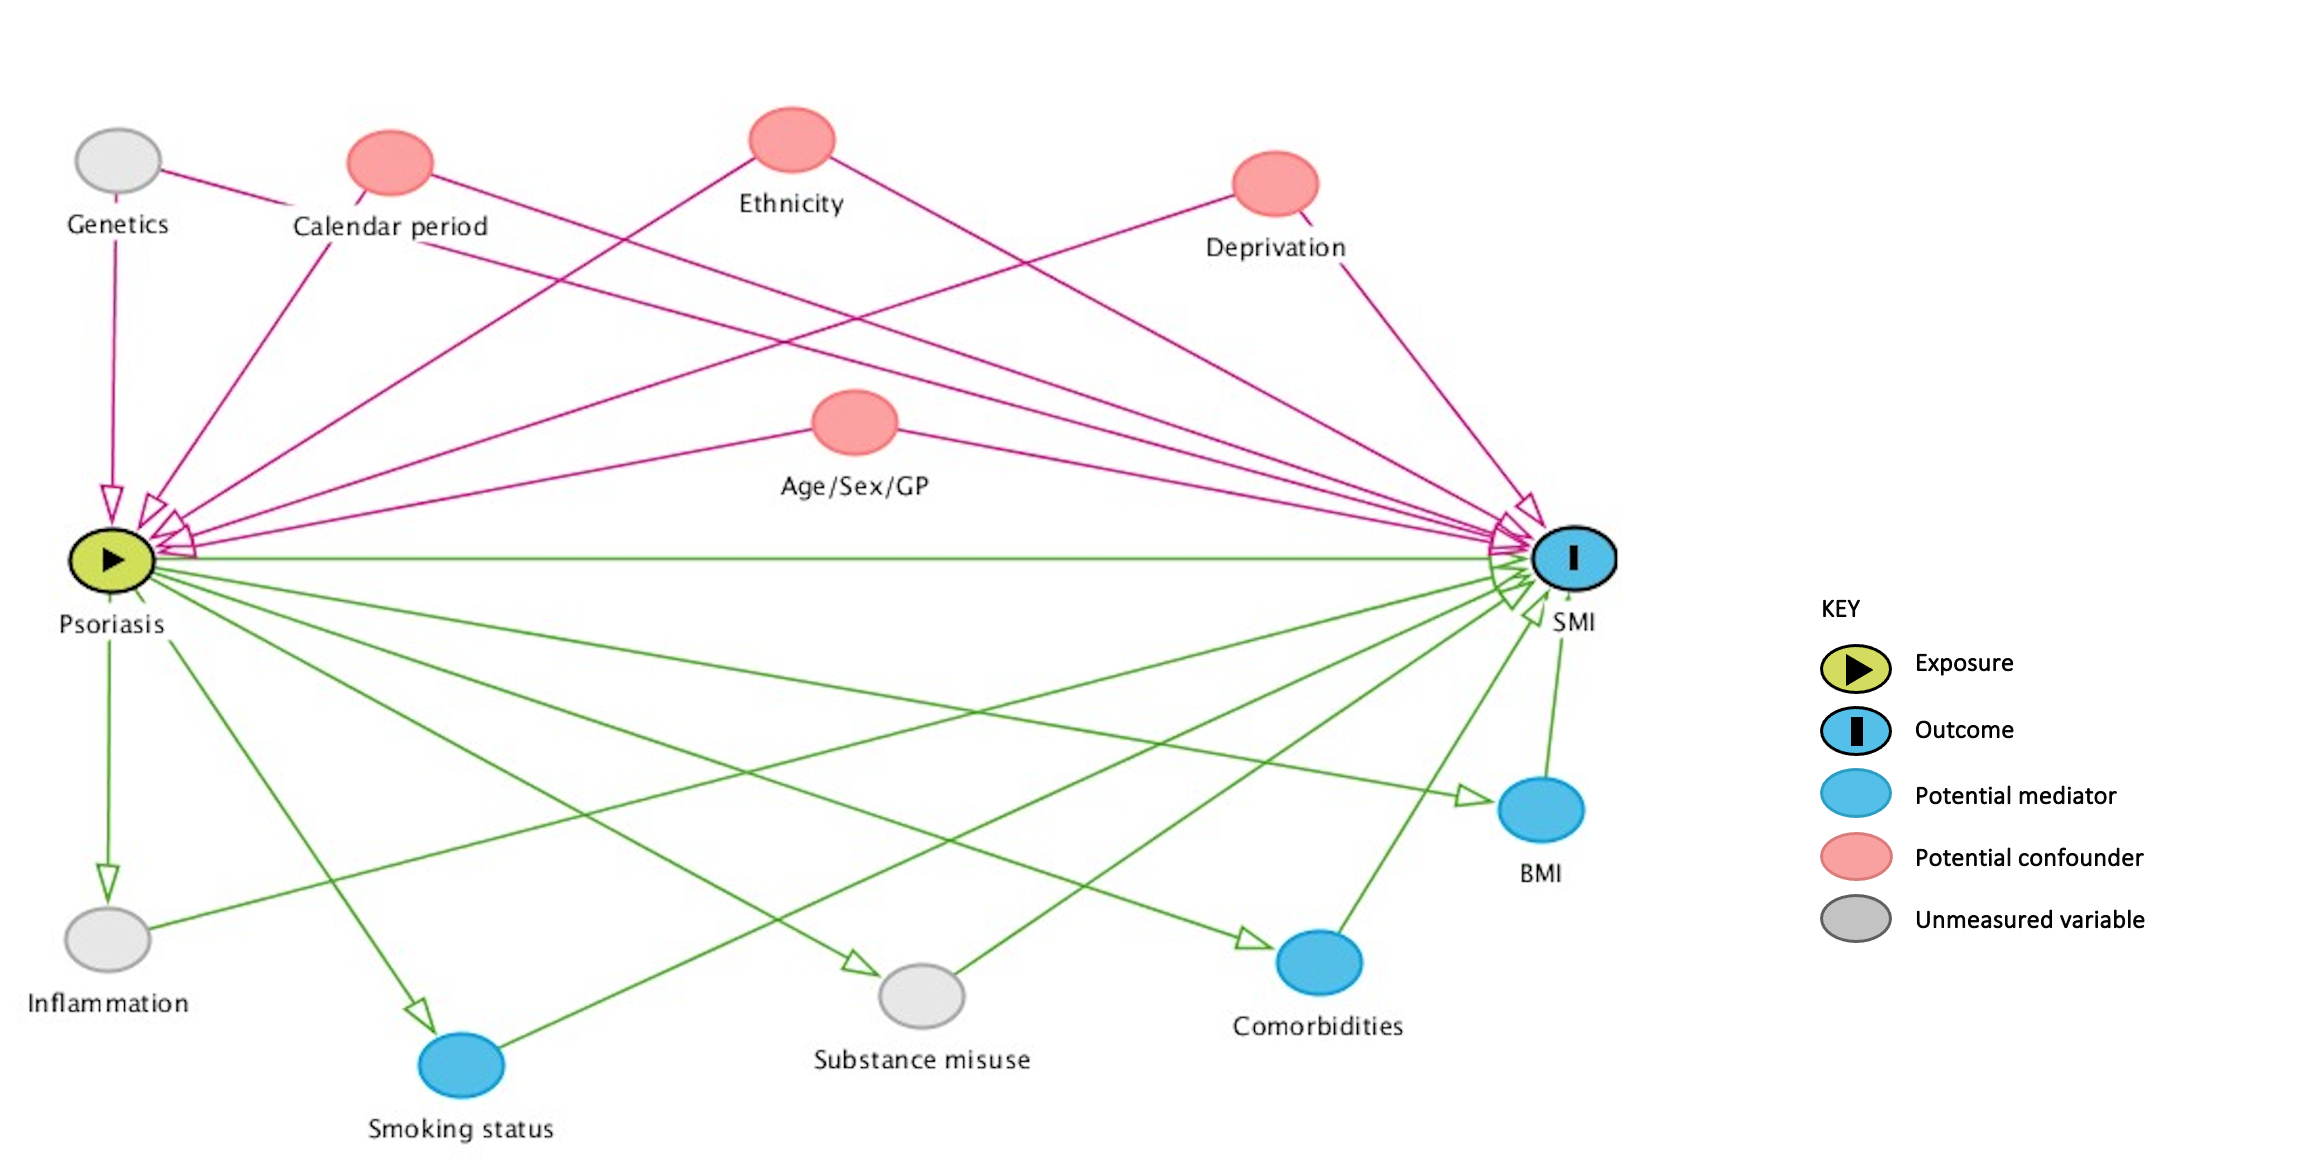


Abbreviations – BMI: Body mass index; GP: General practice; SMI: Severe mental illness

Explanation of variables included in directed acyclic graphs of the relationships between atopic eczema/psoriasis and severe mental illness

| **Variable(s)** | **Type** | **Measured/Unmeasured** | **Justification** |
| --- | --- | --- | --- |
| Age/Sex/General practice | Confounder (matching variables) | Measured | There is evidence that atopic eczema is more prevalent in younger people and in women,1 while the prevalence of psoriasis is higher in males and older individuals.2,3 Age and sex are also associated with SMI. The literature suggests that SMI, particularly schizophrenia, tends to occur between the ages of 15-35,4 with a higher incidence in males.5 As these variables were not on the causal pathway in the association between atopic eczema/psoriasis and SMI, they were considered as potential confounders and used to match individuals in the study. We also matched on general practice to control for clinical and administrative practices that may differ between general practitioners. |
| Body mass index (BMI) | Mediator | Measured | Evidence suggests that a high BMI is associated with atopic eczema and psoriasis. A population-based study in the UK using primary care data found that people with atopic eczema had 8% higher odds of being overweight or obese compared to those without atopic eczema.6 A similar relationship is seen between psoriasis and BMI. A meta-analysis of 16 observational studies found that people with psoriasis had 66% higher odds of obesity compared to those without psoriasis.7 A longitudinal study also found that the risk of new-onset obesity was 18% higher in individuals with psoriasis compared to those without.8 Possible explanations for the association between skin disease and obesity may include people with skin disease avoiding physical exercise to prevent sweat agitating inflamed skin,9 or the underlying systemic inflammation in the skin disease itself leading to weight gain.6  Increased BMI is also associated with SMI. Studies have found a high prevalence of obesity in people with SMI, with these individuals being up to three times more likely to be overweight or obese than the general population.10 However, studies investigating the direction of the relationship between BMI and SMI are limited. There is some evidence to suggest that high BMI may occur as a consequence of SMI. Studies have found that people with SMI diagnoses lead unhealthy lifestyles by consuming poor diets, smoking more and engaging in less physical activity than the general population,11 all factors that contribute to obesity. Second generation antipsychotics such as Olanzapine and Clozapine have been found to result in rapid weight gain, with data suggesting an increase of up to 17kg in the first year of treatment.12 On the other hand, genetics may play a role in the association between BMI and SMI. Genetic linkage studies have suggested that the 1q21– 42 region is of interest as this area is associated with an increased risk of obesity and the development of schizophrenia.10 However, this hypothesis is speculative and not supported by empirical evidence. What we can conclude is that the relationship between BMI and SMI is complex and includes a number of factors.  In the context of this study, we considered BMI as a mediator of the relationship between atopic eczema/psoriasis and SMI. As there is some evidence that increased BMI may occur as a result of SMI diagnosis, we excluded BMI measurements taken after the SMI outcome. Including BMI measurements taken after SMI diagnosis may introduce collider bias in our analysis, attenuating our effect estimates towards the null. |
| Calendar period | Confounder | Measured | The relationship between atopic eczema/psoriasis and SMI may be influenced by various calendar-based factors such as changes in clinical and administrative practices in atopic eczema/psoriasis and SMI over time. Adjusting for calendar period as a confounder in our analysis will allow us to remove any possible calendar variation and effectively assess the true association between atopic eczema/psoriasis and SMI. |
| Comorbidities | Mediator | Measured | Skin diseases are associated with an increased risk of some chronic conditions. For example, individuals with atopic eczema are at increased risk of asthma13 while people with psoriasis are at increased risk of psoriatic arthritis.14 Both atopic eczema and psoriasis are also associated with an increased risk of diabetes and cardiovascular disease.13,15,16  There is compelling evidence that people with SMI experience poorer physical health than the general population, leading to increased morbidity and mortality and a reduction in life expectancy by up to 20 years.17 The prevalence of conditions such as cardiovascular disease, liver disease, respiratory disease and cancer is higher in people with SMI, however, the direction that the relationship occurs is not well established. In other words, it is unknown whether the presence of SMI leads to development of the health issues, or whether the conditions play a mediating role in the development of SMI. There is evidence for both theories. For example, conditions such as cardiovascular disease and diabetes that occur more in people diagnosed with SMI are associated with obesity and metabolic syndrome,18 both of which are known effects of second-generation antipsychotic medication.12 On the other hand, several studies have found evidence of shared genetic mechanisms between physical health conditions and SMI.19,20 In terms of comorbidities mediating the association between skin disease and SMI, there is evidence that people with skin disease are more likely to smoke.9,21 Smoking is a risk factor for cardiovascular disease and some respiratory disease,22 and is also associated with an increased risk of psychosis.23  What we can see from the evidence is that long term physical health conditions and severe mental illness often co-occur, and the direction of the relationship between both conditions is complex and difficult to understand. In the context of this study, we considered comorbidities as mediators of the association between skin disease and SMI. We used the Charlson Comorbidity Index (CCI) as a summary measure to capture the burden of comorbidities at index date. |
| Deprivation | Confounder | Measured | Evidence suggests that the prevalence of atopic eczema or psoriasis is higher in countries or individuals with higher socioeconomic status.24,25 Low socioeconomic status is associated with an increased risk of severe mental health problems.26 Therefore, in this study, we considered deprivation as a potential confounder of the association between atopic eczema/psoriasis and SMI. |
| Ethnicity (sensitivity analyses only) | Confounder | Measured | Atopic eczema has been found to occur more frequently in Asian and Black individuals compared to White individuals,27 while psoriasis is more prevalent in White individuals.28 There are also important ethnic differences in the visual appearance of skin disease, making it likely that skin disease is diagnosed differentially between those of different ethnicities.27,28 There are also ethnic differences in the risk of SMI. In the UK, Black and minority ethnic groups (BME) have been shown to have higher rates of SMI, with the risk of psychosis in Black ethnic groups estimated to be nearly seven times higher than in the White population.29 Due to its association with atopic eczema/psoriasis and SMI, we will consider ethnicity as a potential confounding variable in our analysis. However, ethnicity is not well recorded in the CPRD GOLD dataset prior to the introduction of renumeration for ethnicity recording by the Quality and Outcomes Framework in 2006.30 Therefore, we considered ethnicity as a potential confounder in sensitivity analyses only, restricting cohort entry to adults registered from 2006 onwards. |
| Genetics (psoriasis and SMI only) | Confounder | Unmeasured | Studies have provided evidence for a shared genetic aetiology between schizophrenia and psoriasis,31 and bipolar disorder and psoriasis32 that may involve immune signalling pathways. This relationship is not on the causal pathway, suggesting that genetics are a potential confounder of the association between psoriasis and SMI, or that a shared genetic aetiology is the reason for any observed association. However, genetic information is not routinely recorded in primary care records, therefore this variable is unmeasured.  A genetic association between atopic eczema and SMI has not been established. |
| Harmful alcohol use | Mediator | Measured | Evidence shows that individuals with atopic eczema or psoriasis consume more alcohol than the general population and subsequently have a higher prevalence of alcohol use disorders compared to populations without skin disease.9,33,34 Harmful alcohol use is also linked to SMI. A high prevalence of heavy drinking and alcohol use disorders has been identified in people with SMI.35 Chronic alcohol consumption (consuming large amounts of alcohol for an extended period of time) or alcohol withdrawal in a formerly dependent individual can induce hallucinations or delusions, both of which are symptoms of psychosis.36 Due to this evidence, we considered harmful alcohol use as a potential mediator of the association between atopic eczema/psoriasis and SMI. |
| High dose oral glucocorticoids (atopic eczema and SMI only) | Mediator | Measured | High dose oral glucocorticoids (≥20mg/day prednisolone equivalent dose) are prescribed to individuals with moderate-to-severe atopic eczema.37 During therapy, glucocorticoids can induce symptoms of hypomania, mania, and psychosis, however, their effect is temporary.38 Because of this, we investigated the role of high dose oral glucocorticoids as potential mediators of the association between atopic eczema and SMI. |
| Inflammation | Mediator | Unmeasured | Evidence suggests that atopic eczema and psoriasis result in elevated levels of circulatory pro-inflammatory cytokines. Evidence also suggests that changes in inflammation play an important role in the brain and central nervous system that is associated with SMI.39,40 Inflammation can therefore be considered a potential confounder of the relationship between atopic eczema/psoriasis and SMI. However, inflammation is not recorded in CPRD GOLD, so it is an unmeasured variable. However, in people with atopic eczema, inflammation can lead to itch and cause sleep problems in those affected. |
| Itch and sleep problems (atopic eczema and SMI only) | Mediator | Measured | Evidence suggests that itch is an important consequence of atopic eczema.41 Frequent itching can affect sleep quality.42 High levels of sleep deprivation have been linked to SMI like symptoms such as hallucinations and distorted perceptions.43 Itch and sleep problems can therefore be considered as a potential mediator of the association between atopic eczema and SMI. However, itch is not recorded in CPRD GOLD, so it is an unmeasured variable. On the other hand, sleep problems and sleep quality can be captured in CPRD GOLD, although they are likely to be an underestimate of sleep problems. |
| Smoking status | Mediator | Measured | There is evidence that both atopic eczema and psoriasis are associated with smoking. Adults with atopic eczema are 28% more likely to be current smokers compared to the general population,9 while the prevalence of ever smoking was higher in adults with psoriasis compared to the general population.21 Smoking is also associated with SMI. People with severe mental illnesses such as schizophrenia are up to three times more likely to smoke, and to smoke heavily compared to the general population.44 The reasons why individuals with SMI are more likely to smoke are unclear, however, results of meta-analysis from a large systematic review suggests that daily smokers are more than twice as likely to develop new psychotic disorders compared to non-smokers.23 Daily smokers also developed psychotic illness a an earlier age than non-smokers.23 In this study, we considered smoking status as a potential mediator of the relationship between atopic eczema/psoriasis and SMI. |
| Substance misuse | Mediator | Unmeasured | Evidence suggests that people with atopic eczema or psoriasis are more likely to misuse substances (e.g., cannabis),45,46 and substance misuse is associated with an increased risk of SMI.47 Substance misuse can therefore be considered a potential mediator of the association between atopic eczema/psoriasis and SMI. However, substance misuse is not well recorded in CPRD GOLD, so it has been classified as an unmeasured variable. |

BMI – Body mass index; CPRD – Clinical Practice Research Datalink; SMI – Severe mental illness

**Appendix S3 – Variable definitions**

**Atopic eczema and psoriasis**

We identified atopic eczema and psoriasis using previously validated algorithms.48,49 The atopic eczema algorithm was based on a record of at least one diagnostic code recorded in primary care and at least two records of eczema therapy recorded (in primary care using Read codes or prescription data) on separate days. Eczema therapy included: (1) records of phototherapy identified using Read codes in primary care and (2) primary care prescription records for topical emollients, corticosteroids or calcineurin inhibitors, or oral glucocorticoids, azathioprine, methotrexate, ciclosporin or mycophenolate. The psoriasis algorithm was based on a record of at least one diagnostic code recorded in primary care.

**Severe mental illness**

We identified severe mental illness based on the earliest record of a diagnostic Read code for severe mental illness (schizophrenia, bipolar disorder, other non-organic psychoses) recorded in primary care. We considered broader definitions of the severe mental illness outcome (including ‘symptom’ codes such as delusions) that are not exclusive to the condition in sensitivity analyses.

**General practice**

We matched on general practice as an indirect method to capture and adjust for general practice location (i.e., rural, or urban locations) and socioeconomic deprivation. Matching individuals on general practice also allowed us to account for differences in coding practices between GPs.

**Calendar period**

Calendar period was categorised as 1997 – 2003, 2004 – 2009, 2010 – 2015, and 2016 – 2020 to account for changes in clinical, diagnostic, and administrative practices over the study period that may have influenced the measurement of exposure, outcomes, and other covariates.

**Comorbidities**

We used the Charlson Comorbidity Index (CCI) as a summary measure to capture the burden of comorbidities recorded on or before index date. The CCI is a method of categorising comorbidities of individuals that assigns weights to each of the 17 conditions included in the index, and then sums the weights of those conditions present in the individual.50,51 Each condition in the CCI is weighted from one to six, with a weight of six representing the most severe morbidity.50 The sum of the weights in each individual results in a single comorbidity summary score. We categorised CCI scores into 3 groups: low (0 points), intermediate (1-2 points), and high (≥3 points).

**Deprivation**

We used the Carstairs Index (CI) as a proxy for socioeconomic deprivation. The Carstairs Index was measured using quintiles of the individual-level Carstairs scores from 2011 census data linked via the individual postal code. Patient level Carstairs data was only available for people in English practices that consented to participate in the linkage scheme. When individual-level data was unavailable, we used practice-level Carstairs data.

**Ethnicity**

We identified ethnicity using a previously validated algorithm that identifies ethnicity using primary care electronic health records.30 The algorithm classifies ethnicity into five categories – White, South Asian, Black, Other or Mixed – and is suggested for use with the CPRD dataset from 2006 onwards to maximise completeness and comparability of data.

**Harmful alcohol use**

We defined harmful alcohol use based on primary care morbidity codes suggesting harmful or heavy alcohol use (including alcohol dependency codes and codes related to physical/psychological harm related to alcohol use) or a prescription for drugs used to maintain abstinence (acamprosate, disulfiram, or nalmefene). Individuals were defined as harmful alcohol users on the date of the first record of a relevant morbidity code or prescription.

**High-dose oral glucocorticoid use**

We identified prescriptions for oral glucocorticoids (prednisolone, betamethasone, deflazacort, dexamethasone, hydrocortisone, methylprednisolone, prednisone, triamcinolone, and cortisone) and converted the prescribed daily dose to the prednisolone-equivalent dose (PED). High-dose oral glucocorticoid use was defined as a dose of 20 mg/day or higher PED. We captured high-dose oral glucocorticoid use as a binary time-updated variable with status changing for a short period (90 days) on the date of the first record of a prescription for a dose of 20mg/day or more PED.

**Sleep problems**

We identified sleep problems based on primary care morbidity codes suggesting sleep problems and prescriptions for drugs used to manage sleep problems. In our main analysis, this included diagnostic Read codes (for insomnia, sleep disorders, poor sleep pattern, or other sleep disturbances) and prescriptions for drugs that are only used to treat sleep problems (zaleplon, zolpidem tartrate, zopiclone, hydroxyzine hydrochloride and promethazine hydrochloride when taken at night). In our sensitivity analysis, we used alternative code lists including prescriptions for drugs that may be prescribed for sleep problems but can also be prescribed for other conditions (melatonin and benzodiazepines).

**Smoking status and body mass index (BMI)**

We defined BMI and smoking status using an algorithm using primary care records to identify the status recorded closest to the cohort entry date. The algorithm regarded records identified within -1 year to +1 month of the index date as the best, +1 month to +1 year from the index date as second best, the nearest before -1 year from the index date as the third best, and the nearest after +1 year from the index date as the worst. We did not include smoking status or BMI recorded after the outcome had occurred. Smoking status was classified as: (1) current/ex-smoker; or (2) non-smoker. BMI was classified according to the World Health Organisation categories: underweight (<18.5kg/m2); normal weight (18.5-24.9 kg/m2); pre-obesity (25.0-29.9 kg/m2); obese (≥30.0 kg/m2). Smoking status or BMI recorded after SMI diagnosis were not used.

**Appendix S4 – Testing proportional hazards assumption using Schoenfeld residual plots**

We tested the proportional hazards assumption of our confounder-adjusted Cox regression models (adjusted for socioeconomic deprivation and calendar period) using Schoenfeld residual plots. In the confounder-adjusted models in the atopic eczema and psoriasis cohorts, there was no evidence that the proportional hazards assumption was violated.

**Confounder-adjusted model in the atopic eczema cohort: p=0.9998**


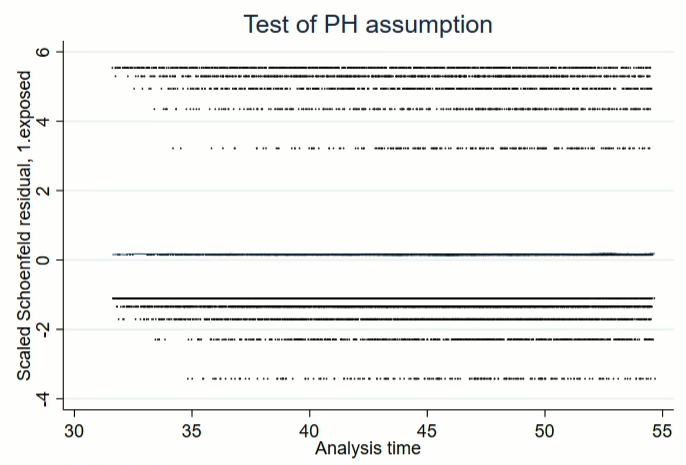


**Confounder-adjusted model in the psoriasis cohort: p=0.2514**


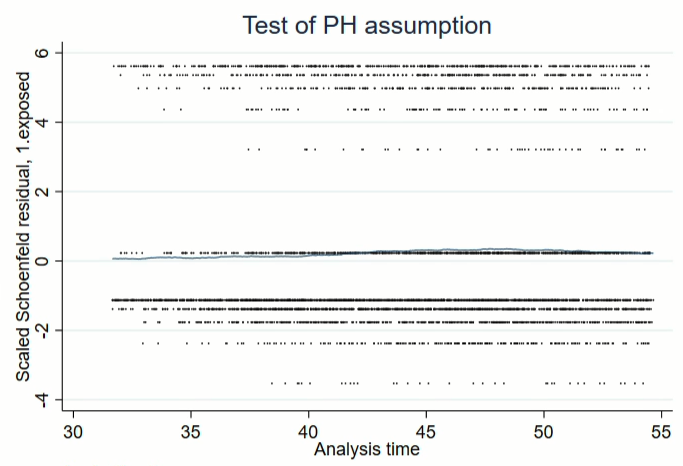


**Appendix S5 – Secondary analyses**

In secondary analyses, we investigated whether the association between atopic eczema or psoriasis and severe mental illness was: (1) affected by atopic eczema or psoriasis severity; and (2) modified by age, sex, or calendar period. We also individually tested the effects of potential mediators on the confounder-adjusted associations between atopic eczema or psoriasis and severe mental illness in separate models in a post-hoc analysis.

**Atopic eczema and psoriasis severity definitions**

In analyses examining atopic eczema or psoriasis severity, we classified individuals with atopic eczema as having mild, moderate, or severe disease, and individuals with psoriasis as having mild or moderate-to-severe disease using previously developed definitions.52,53 We considered individuals to have mild disease by default. We classified individuals as having moderate atopic eczema from the first of: (1) a second potent topical corticosteroid prescription within one year; or (2) a first prescription for a topical calcineurin inhibitor. We classified adults as having severe atopic eczema from the first of: (1) use of phototherapy or systemic treatment for atopic eczema (excluding systemic glucocorticoids, as they may have been prescribed for coexisting asthma); or (2) referral to a dermatologist. We classified adults as having moderate-to-severe psoriasis if they had any records of phototherapy or prescription records for systemic (acitretin, etretinate, ciclosporin, hydroxycarbamide, methotrexate, and fumaric acid) or biologic (etanercept, adalimumab, infliximab, ustekinumab, and efalizumab) therapies. We updated severity over time, and once an individual was defined as having severe atopic eczema or moderate-to-severe psoriasis, they remained in this category for the rest of follow-up and could not be categorised as having milder disease.

**Statistical analysis**

*Atopic eczema and psoriasis severity*

We redefined atopic eczema or psoriasis exposure using atopic eczema or psoriasis severity. Using the same methods as the main analyses, we constructed stratified Cox regression models implicitly adjusted for matching variables (age, sex, general practice) and then sequentially adjusted for potential confounders (deprivation and calendar period) and potential mediators (comorbidities, harmful alcohol use, smoking status, and body mass index, and, in atopic eczema only, sleep problems and high-dose glucocorticoid use).

*Effect modification by age, sex, or calendar period*

We tested effect modification by constructing stratified Cox regression models with and without an interaction term between the exposure variable (atopic eczema or psoriasis) and the potential effect modifier (age, sex, or calendar period) and conducting likelihood ratio tests.

**References**

1. Pedersen CJ, Uddin MJ, Saha SK, Darmstadt GL. Prevalence of atopic dermatitis, asthma and rhinitis from infancy through adulthood in rural Bangladesh: a population-based cross-sectional survey. *BMJ Open*. 2020;10:e042380.
2. Augustin M, Reich K, Glaeske G, Schaefer I, Radtke M. Co-morbidity and age-related prevalence of psoriasis: Analysis of health insurance data in Germany. *Acta Derm Venereol*. 2010;90(2):147-51.
3. Icen M, Crowson CS, McEvoy MT, Dann FJ, Gabriel SE, Maradit Kremers H. Trends in incidence of adult-onset psoriasis over three decades: a population-based study. *J Am Acad Dermatol*. 2009;60(3):394-401.
4. Kessler RC, Amminger GP, Aguilar-Gaxiola S, Alonso J, Lee S, Ustün TB. Age of onset of mental disorders: a review of recent literature. *Curr Opin Psychiatry*. 2007;20(4):359-64.
5. Ochoa S, Usall J, Cobo J, Labad X, Kulkarni J. Gender differences in schizophrenia and first-episode psychosis: a comprehensive literature review. *Schizophr Res Treatment*. 2012;2012:916198.
6. Ascott A, Mansfield KE, Schonmann Y, Mulick A, Abuabara K, Roberts A et al. Atopic eczema and obesity: a population-based study. *Br J Dermatol*. 2021;184(5):871-879.
7. Armstrong AW, Harskamp CT, Armstrong EJ. The association between psoriasis and obesity: a systematic review and meta-analysis of observational studies. *Nutr Diabetes*. 2012;2(12):e54.
8. Kaye JA, Li L, Jick SS. Incidence of risk factors for myocardial infarction and other vascular diseases in patients with psoriasis. *Br J Dermatol*. 2008;159(4):895-902.
9. Silverberg JI, Greenland P. Eczema and cardiovascular risk factors in 2 US adult population studies. *J Allergy Clin Immunol*. 2015;135(3):721-8.e6.
10. Holt RI, Peveler RC. Obesity, serious mental illness and antipsychotic drugs. *Diabetes Obes Metab*. 2009;11(7):665-79.
11. Annamalai A, Kosir U, Tek C. Prevalence of obesity and diabetes in patients with schizophrenia. *World J Diabetes*. 2017;8(8):390-396.
12. Bradshaw T, Mairs H. Obesity and Serious Mental Ill Health: A Critical Review of the Literature. *Healthcare (Basel)*. 2014;2(2):166-82.
13. Silverberg JI, Gelfand JM, Margolis DJ, Boguniewicz M, Fonacier L, Grayson MH et al. Association of atopic dermatitis with allergic, autoimmune, and cardiovascular comorbidities in US adults. *Ann Allergy Asthma Immunol*. 2018;121(5):604-612.e3.
14. Ogdie A, Gelfand JM. Clinical Risk Factors for the Development of Psoriatic Arthritis Among Patients with Psoriasis: A Review of Available Evidence. *Curr Rheumatol Rep*. 2015;17(10):64.
15. Silverwood RJ, Forbes HJ, Abuabara K, Ascott A, Schmidt M, Schmidt SAJ et al. Severe and predominantly active atopic eczema in adulthood and long term risk of cardiovascular disease: population based cohort study. *BMJ*. 2018;361:k1786.
16. Miller IM, Ellervik C, Yazdanyar S, Jemec GB. Meta-analysis of psoriasis, cardiovascular disease, and associated risk factors. *J Am Acad Dermatol*. 2013;69(6):1014-24.
17. GOV.UK. Severe mental illness (SMI) and physical health inequalities: briefing. Available from: https://www.gov.uk/government/publications/severe-mental-illness-smi-physical- health- inequalities/severe-mental-illness-and-physical-health-inequalities-briefing#smiprevalence. Accessed 9th March 2022
18. Haffner SM. Relationship of metabolic risk factors and development of cardiovascular disease and diabetes. *Obesity (Silver Spring)*. 2006;14 Suppl 3:121S-127S.
19. Hackinger S, Prins B, Mamakou V, Zengini E, Marouli E, Brčić L et al. Evidence for genetic contribution to the increased risk of type 2 diabetes in schizophrenia. *Transl Psychiatry*. 2018;8:252.
20. Strawbridge RJ, Johnston KJA, Bailey MES, Baldassarre D, Cullen B, Eriksson P et al. The overlap of genetic susceptibility to schizophrenia and cardiometabolic disease can be used to identify metabolically different groups of individuals. *Sci Rep*. 2021;11:632.
21. Gazel U, Ayan G, Solmaz D, Akar S, Aydin SZ. The impact of smoking on prevalence of psoriasis and psoriatic arthritis. *Rheumatology (Oxford)*. 2020;59(10):2695-2710.
22. Gao K, Shi X, Wang W. The life-course impact of smoking on hypertension, myocardial infarction and respiratory diseases. *Sci Rep*. 2017;7(1):4330.
23. Gurillo P, Jauhar S, Murray RM, MacCabe JH. Does tobacco use cause psychosis? Systematic review and meta-analysis. *Lancet Psychiatry*. 2015;2(8):718-725.
24. Uphoff E, Cabieses B, Pinart M, Valdés M, Antó JM, Wright J. A systematic review of socioeconomic position in relation to asthma and allergic diseases. *Eur Respir J*. 2015;46(2):364-74.
25. Peng C, Xu X, Chen W, Li X, Yi X, Ding Y et al. Epidemiological Variations in the Global Burden of Psoriasis, an Analysis With Trends From 1990 to 2017. *Front Med (Lausanne)*. 2021;8:585634.
26. Mental Health Foundation. Mental health statistics: poverty. Available from: https://www.mentalhealth.org.uk/statistics/mental-health-statistics-poverty. Accessed 9th March 2022
27. Kaufman BP, Guttman-Yassky E, Alexis AF. Atopic dermatitis in diverse racial and ethnic groups-Variations in epidemiology, genetics, clinical presentation and treatment. *Exp Dermatol*. 2018;27(4):340-357.
28. Alexis AF, Blackcloud P. Psoriasis in skin of color: epidemiology, genetics, clinical presentation, and treatment nuances. *J Clin Aesthet Dermatol*. 2014;7(11):16-24.
29. Mental Health Foundation. Black, Asian and Minority Ethnic (BAME) communities. Available from: [https://www.mentalhealth.org.uk/a-to-z/b/black-asian-and-minority-ethnic-bame-communities. Accessed 9th March 2022](https://www.mentalhealth.org.uk/a-to-z/b/black-asian-and-minority-ethnic-bame-communities.%20Accessed%209th%20March%202022)
30. Mathur R, Bhaskaran K, Chaturvedi N, Leon DA, vanStaa T, Grundy E et al. Completeness and usability of ethnicity data in UK-based primary care and hospital databases. *J Public Health (Oxf)*. 2014;36(4):684-92.
31. Yin X, Wineinger NE, Wang K, Yue W, Norgren N, Wang L et al. Common susceptibility variants are shared between schizophrenia and psoriasis in the Han Chinese population. *J Psychiatry Neurosci*. 2016;41(6):413-421.
32. Demirhan O, Demirbek B, Tunç E, Uslu IN, Çetiner S, Serin A. Identification of chromosome abnormalities in screening of a family with manic depression and psoriasis: predisposition to aneuploidy. *Asian J Psychiatr*. 2012;5(2):169-74.
33. Al-Jefri K, Newbury-Birch D, Muirhead CR, Gilvarry E, Araújo-Soares V, Reynolds NJ et al. High prevalence of alcohol use disorders in patients with inflammatory skin diseases. *Br J Dermatol*. 2017;177(3):837-844.
34. Brenaut E, Horreau C, Pouplard C, Barnetche T, Paul C, Richard MA et al. Alcohol consumption and psoriasis: a systematic literature review. *J Eur Acad Dermatol Venereol*. 2013;27 Suppl 3:30-5.
35. Menezes PR, Johnson S, Thornicroft G, Marshall J, Prosser D, Bebbington P et al. Drug and alcohol problems among individuals with severe mental illness in south London. *Br J Psychiatry*. 1996;168(5):612-9.
36. Stankewicz HA, Richards JR, Salen P. Alcohol Related Psychosis. Treasure Island (FL):StatPearls Publishing; 2021.
37. Drucker AM, Eyerich K, de Bruin-Weller MS, Thyssen JP, Spuls PI, Irvine AD et al. Use of systemic corticosteroids for atopic dermatitis: International Eczema Council consensus statement. *Br J Dermatol*. 2018;178(3):768-775.
38. Brown ES, Chandler PA. Mood and Cognitive Changes During Systemic Corticosteroid Therapy. *Prim Care Companion J Clin Psychiatry*. 2001;3(1):17-21.
39. Müller N, Weidinger E, Leitner B, Schwarz MJ. The role of inflammation in schizophrenia. *Front Neurosci*. 2015;9:372.
40. Fries GR, Walss-Bass C, Bauer ME, Teixeira AL. Revisiting inflammation in bipolar disorder. *Pharmacol Biochem Behav*. 2019;177:12-19.
41. Yosipovitch G, Papoiu AD. What causes itch in atopic dermatitis? *Curr Allergy Asthma Rep*. 2008;8(4):306-11.
42. Chrostowska-Plak D, Reich A, Szepietowski JC. Relationship between itch and psychological status of patients with atopic dermatitis. *J Eur Acad Dermatol Venereol*. 2013;27(2):e239-42.
43. Waters F, Chiu V, Atkinson A, Blom JD. Severe Sleep Deprivation Causes Hallucinations and a Gradual Progression Toward Psychosis With Increasing Time Awake. *Front Psychiatry*. 2018;10;9:303.
44. Szatkowski L, McNeill A. Diverging trends in smoking behaviors according to mental health status. *Nicotine Tob Res*. 2015;17(3):356-60.
45. Drucker AM, Field AE, Li WQ, Cho E, Li T, Corliss HL et al. Childhood Atopic Dermatitis and Risk of Problematic Substance Use. *Dermatitis*. 2018;29(3):168-170.
46. Zink A, Herrmann M, Fischer T, Lauffer F, Garzorz-Stark N, Böhner A et al. Addiction: an underestimated problem in psoriasis health care. *J Eur Acad Dermatol Venereol*. 2017;31(8):1308-1315.
47. Polimanti R, Agrawal A, Gelernter J. Schizophrenia and substance use comorbidity: a genome-wide perspective. *Genome Med*. 2017 Mar 21;9(1):25.
48. P Abuabara K, Magyari AM, Hoffstad O, et al. Development and Validation of an Algorithm to Accurately Identify Atopic Eczema Patients in Primary Care Electronic Health Records from the UK. *J Invest Dermatol*. 2017; 137: 1655–62.
49. Seminara NM, Abuabara K, Shin DB, et al. Validity of The Health Improvement Network (THIN) for the study of psoriasis. *Br J Dermatol*. 2011; 164(3): 602-9.
50. Charlson M, Szatrowski TP, Peterson J, Gold J. Validation of a combined comorbidity index. *J Clin Epidemiol*. 1994;47(11):1245-51.
51. Austin SR, Wong YN, Uzzo RG, Beck JR, Egleston BL. Why Summary Comorbidity Measures Such As the Charlson Comorbidity Index and Elixhauser Score Work. *Med Care*. 2015;53(9):e65-72.
52. Mansfield KE, Schmidt SAJ, Darvalics B, Mulick A, Abuabara K, Wong AYS et al. Association Between Atopic Eczema and Cancer in England and Denmark. *JAMA Dermatol*. 2020;156(10):1086-1097.
53. Parisi R, Rutter MK, Lunt M, Young HS, Symmons DPM, Griffiths CEM, Ashcroft DM et al. Psoriasis and the Risk of Major Cardiovascular Events: Cohort Study Using the Clinical Practice Research Datalink. *J Invest Dermatol*. 2015;135(9):2189-2197.

Table S1: Description of sensitivity analyses, and HR (95% CI) of sensitivity analyses

| **Description** | **Justification** | **Atopic eczema cohort** | | | | **Psoriasis cohort** | | | |
| --- | --- | --- | --- | --- | --- | --- | --- | --- | --- |
|  |  | **Number of individuals** | **PYAR** | **Events** | **HR (95% CI)** | **Number of individuals** | **PYAR** | **Events** | **HR (95% CI)** |
| **Main analysis** | | **988,961** | **6,686,453** | **3,012** | **1.17 (1.12, 1.22)** | **346,659** | **2,523,477** | **1,107** | **1.26 (1.18, 1.35)** |
| Repeating the main analysis using broader definitions of severe mental illness (main analysis code list includes definite diagnostic codes only, sensitivity analysis code list expanded to include symptom codes). | To explore the sensitivity of the results due to the definition of the severe mental illness outcome. | 988,558 | 6,683,082 | 3,382 | 1.17 (1.12, 1.22) | 225,751 | 1,863,129 | 876 | 1.23 (1.13, 1.33) |
|  |  |  |  |  |  |  |  |  |  |
| Additionally adjusting for ethnicity (White, South Asian, Black, Other, or Mixed, identified from CPRD) in the main analysis | To examine whether the omission of ethnicity as a covariate in the main analysis induced bias. | 398,892 | 2,613,527 | 1,134 | 1.09 (1.01, 1.17) | 141,363 | 987,918 | 425 | 1.17 (1.04, 1.32) |
| Restricting cohort entry to a subset of individuals registered from 2006 onwards and additionally adjusting for ethnicity (White, South Asian, Black, Other, or Mixed, identified from CPRD) in the main analysis. | Records for ethnicity became more complete following the introduction of renumeration for including ethnicity data in the Quality and Outcomes Framework in 2006. | 302,479 | 1,300,586 | 656 | 1.09 (1.00, 1.20) | 101,145 | 424,831 | 221 | 1.23 (1.04, 1.45) |
| Restricting cohort entry to individuals with at least one consultation with their GP in the year before cohort entry. | To exclude individuals who are practice non-attenders. There may be differential recording of exposure, covariates and outcomes among practice attenders and non-attenders. For example, practice non-attenders may be more likely to have missing smoking or BMI data. | 713,400 | 4,903,938 | 2,344 | 1.09 (1.04, 1.15) | 294,096 | 2,118,249 | 956 | 1.15 (1.06, 1.24) |
| Restricting cohort entry to individuals entering from 2004 onwards. | To account for changes in diagnostic and coding practices over time – specifically those introduced by the Quality and Outcomes Framework in 2004. This is likely to be more important for severe mental illness outcomes and some covariates. However, as there are no specific dermatology indicators in the Quality and Outcomes Framework, it is unlikely that eczema/psoriasis coding was affected. | 672,037 | 3,379,069 | 1,586 | 1.15 (1.08, 1.22) | 214,940 | 1,080,332 | 551 | 1.41 (1.28, 1.56) |
| **Main analysis adjusted for potential mediators** | | 793,030 | 5,789,012 | 2,632 | 0.98 (0.93, 1.04) | n/a | n/a | n/a | n/a |
| Repeating the main analysis using less strict definitions for sleep problems (main analysis code list includes Zolpidem and Zopiclone which are only prescribed for sleep problems, sensitivity analysis code list expanded to include prescriptions for benzodiazepines, melatonin, and other drugs). | To explore whether including broader drugs that are prescribed for conditions other than sleep disturbances further mediates the association between atopic eczema and severe mental illness. | 793,030 | 5,789,012 | 2,632 | 0.99 (0.93, 1.04) | n/a | n/a | n/a | n/a |

Abbreviations: CI – Confidence Interval; HR – Hazard Ratio; PYAR – Person years at risk

Table S2: Person-time under follow-up in atopic eczema and psoriasis cohorts broken down by individual-level characteristics and atopic eczema or psoriasis exposure status. Values are person-years-at-risk (percentages) unless stated otherwise

|  | **Atopic eczema cohort** | | **Psoriasis cohort** | |
| --- | --- | --- | --- | --- |
|  | **With atopic eczema** | **Without atopic eczema** | **With psoriasis** | **Without psoriasis** |
| Total person-years | 6,995,892 | 30,935,170 | 2,680,394 | 13,246,255 |
| Median (IQR) duration of follow-up (years) a | 5.5 (2.2-10.4) | 4.8 (1.8-9.6) | 5.9 (2.3-11.5) | 5.9 (2.4-11.4) |
| **Sex** |  |  |  |  |
| Female (%) | 4,142,744 (59.2%) | 17,896,266 (57.9%) | 1,389,969 (51.9%) | 6,882,671 (52.0%) |
| **Age (years)** |  |  |  |  |
| 18-29 | 1,821,306 (26.0%) | 7,906,322 (25.6%) | 480,020 (17.9%) | 2,376,484 (17.9%) |
| 30-39 | 1,194,264 (17.1%) | 5,357,387 (17.3%) | 533,158 (19.9%) | 2,607,097 (19.7%) |
| 40-59 | 2,133,928 (30.5%) | 9,668,584 (31.3%) | 1,007,482 (37.6%) | 4,980,894 (37.6%) |
| 60+ | 1,846,393 (26.4%) | 8,002,878 (25.9%) | 659,734 (24.6%) | 3,281,779 (24.8%) |
| **Quintiles of Carstairs deprivation index b** | |  |  |  |
| 1(least deprived) | 883,375 (12.6%) | 3,886,119 (12.6%) | 320,447 (12.0%) | 1,589,287 (12.0%) |
| 2 | 1,339,495 (19.1%) | 5,927,456 (19.2%) | 477,698 (17.8%) | 2,375,948 (17.9%) |
| 3 | 1,406,243 (20.1%) | 6,250,620 (20.2%) | 555,215 (20.7%) | 2,753,249 (20.8%) |
| 4 | 1,667,207 (23.8%) | 7,397,501 (23.9%) | 639,720 (23.9%) | 3,162,484 (23.9%) |
| 5(most deprived) | 1,390,133 (19.9%) | 6,103,569 (19.7%) | 530,397 (19.8%) | 2,610,341 (19.7%) |
| Missing | 309,438 (4.4%) | 1,369,906 (4.4%) | 156,916 (5.9%) | 754,946 (5.7%) |
| **Body mass index (kg/m2) c** |  |  |  |  |
| Underweight (<18.5) | 158,610 (2.3%) | 677,371 (2.2%) | 44,123 (1.6%) | 243,402 (1.8%) |
| Normal (18.5-24.9) | 2,669,225 (38.2%) | 11,172,418 (36.1%) | 916,940 (34.2%) | 4,716,013 (35.6%) |
| Overweight (25-29.9) | 2,062,211 (29.5%) | 8,599,887 (27.8%) | 853,808 (31.9%) | 3,991,258 (30.1%) |
| Obese (30+) | 1,293,157 (18.5%) | 5,181,420 (16.7%) | 579,219 (21.6%) | 2,370,550 (17.9%) |
| Missing | 812,690 (11.6%) | 5,304,074 (17.1%) | 286,304 (10.7%) | 1,925,031 (14.5%) |
| **Smoking c** |  |  |  |  |
| Non-smoker | 3,800,397 (54.3%) | 16,306,983 (52.7%) | 1,187,908 (44.3%) | 6,845,726 (51.7%) |
| Current or ex-smoker | 3,063,083 (43.8%) | 12,773,438 (41.3%) | 1,435,864 (53.6%) | 5,750,191 (43.4%) |
| Missing | 132,412 (1.9%) | 1,854,750 (6.0%) | 56,622 (2.1%) | 650,338 (4.9%) |
| **Harmful alcohol use (%) c** | 565,890 (8.1%) | 2,175,554 (7.0%) | 209,626 (7.8%) | 824,001 (6.2%) |
| **Sleep problems (%) c** | 2,176,362 (31.1%) | 6,583,496 (21.3%) | n/a | n/a |
| **Ethnicity** |  |  |  |  |
| White | 2,678,104 (38.3%) | 11,206,208 (36.2%) | 1,082,735 (40.4%) | 4,647,093 (35.1%) |
| South Asian | 133,986 (1.9%) | 408,814 (1.3%) | 24,294 (0.9%) | 122,941 (0.9%) |
| Black | 53,792 (0.8%) | 217,837 (0.7%) | 5,246 (0.2%) | 62,052 (0.5%) |
| Other | 39,107 (0.6%) | 162,749 (0.5%) | 9,062 (0.3%) | 54,187 (0.4%) |
| Mixed | 18,108 (0.3%) | 69,767 (0.2%) | 3,665 (0.1%) | 19,613 (0.1%) |
| Not stated or missing | 4,072,794 (58.2%) | 18,869,795 (61.0%) | 1,555,391 (58.0%) | 8,340,370 (63.0%) |
| **Charlson comorbidity index c** |  |  |  |  |
| Low (0) | 4,557,168 (65.1%) | 23527501 (76.1%) | 1,960,454 (73.1%) | 10,023,005 (75.7%) |
| Moderate (1-2) | 2,215,747 (31.7%) | 6,555,345 (21.2%) | 640,230 (23.9%) | 2,879,902 (21.7%) |
| Severe (3 or more) | 222,976 (3.2%) | 852,325 (2.8%) | 79,711 (3.0%) | 343,348 (2.6%) |
| **Calendar period** |  |  |  |  |
| 1997-2003 | 1,161,675 (16.6%) | 5,411,017 (17.5%) | 472,670 (17.6%) | 2,308,729 (17.4%) |
| 2004-2009 | 2,087,878 (29.8%) | 9,259,211 (29.9%) | 836,276 (31.2%) | 4,083,446 (30.8%) |
| 2010-2015 | 2,587,796 (37.0%) | 11,213,477 (36.2%) | 942,558 (35.2%) | 4,681,819 (35.3%) |
| 2016-2020 | 1,158,542 (16.6%) | 5,051,465 (16.3%) | 428,889 (16.0%) | 2,172,262 (16.4%) |
| **High-dose oral glucocorticoids (20mg+ prednisolone equivalent dose)** | 695,906 (9.9%) | 2,567,956 (8.3%) | n/a | n/a |

Abbreviations: IQR: Interquartile range

Individuals can contribute data as both eczema or psoriasis exposed and unexposed. Therefore, numbers of exposed/unexposed do not total the whole cohort, as individuals may be included in more than one column.

a Follow-up based on censoring at the earliest of: death, no longer registered with practice, practice no longer contributing to CPRD, or severe mental illness diagnosis

b Carstairs deprivation index based on practice-level data (from 2011).

c Based on records closest to index date.

|  | | |  | |  |  |  |  |  |  |
| --- | --- | --- | --- | --- | --- | --- | --- | --- | --- | --- |
|  |  |  | |
|  | | |  | |  |  |  |  |  |  |
|  | | |  | |  |  |  |  |  |  |
|  | | |  | |  |  |  |  |  |  |

Table S3: Characteristics of the atopic eczema study population at cohort entry, for: the overall cohort, individuals included in the model additionally adjusting for potential confounders (i.e., individuals with no missing Carstairs deprivation data), individuals with missing Carstairs data, individuals included in the model additionally adjusting for potential mediators (i.e., individuals with no missing BMI or smoking status data), and for individuals with missing BMI or smoking status

|  | **Overall cohort** | | **Sample included in model adjusting for potential confounders** | | **Individuals with missing Carstairs data** | | **Sample included in model adjusting for potential mediators** | | **Individuals with missing BMI data** | | **Individuals with missing smoking data** | |
| --- | --- | --- | --- | --- | --- | --- | --- | --- | --- | --- | --- | --- |
|  | **With atopic eczema** | **Without atopic eczema** | **With atopic eczema** | **Without atopic eczema** | **With atopic eczema** | **Without atopic eczema** | **With atopic eczema** | **Without atopic eczema** | **With atopic eczema** | **Without atopic eczema** | **With atopic eczema** | **Without atopic eczema** |
| **Number** | 1,023,232 | 4,908,059 | 988,961 | 4,744,478 | 34,271 | 163,581 | 793,030 | 3,117,531 | 174,188 | 1,111,873 | 46,553 | 467,794 |
| **Follow-up a** |  |  |  |  |  |  |  |  |  |  |  |  |
| Total person-years | 6,995,892 | 30,935,170 | 6,686,453 | 29,565,265 | 309,438 | 1,369,906 | 5,789,012 | 21,282,283 | 812,690 | 5,304,074 | 132,412 | 1,854,750 |
| Median (IQR) duration of follow-up (years) | 5.5 (2.2-10.4) | 4.8 (1.8-9.6) | 5.4 (2.2-10.3) | 4.8 (1.8-9.5) | 8.0 (3.4-13.9) | 7.1 (2.9-13.0) | 6.1 (2.6-11.0) | 5.5 (2.2-10.4) | 3.3 (1.3-6.8) | 3.3 (1.2-7.1) | 1.8 (0.7-3.9) | 2.5 (1.0-5.6) |
| **Sex** |  |  |  |  |  |  |  |  |  |  |  |  |
| Female (%) | 596,388 (58.3%) | 2,842,125 (57.9%) | 576,743 (58.3%) | 2,749,167 (57.9%) | 19,645 (57.3%) | 92,958 (56.8%) | 492,472 (62.1%) | 1,980,741 (63.5%) | 73,146 (42.0%) | 489,237 (44.0%) | 20,518 (44.1%) | 212,283 (45.4%) |
| **Age (years) b** |  |  |  |  |  |  |  |  |  |  |  |  |
| 18-29 | 326,309 (31.9%) | 1,566,148 (31.9%) | 313,707 (31.7%) | 1,506,029 (31.7%) | 12,602 (36.8%) | 60,119 (36.8%) | 190,200 (24.0%) | 643,243 (20.6%) | 112,854 (64.8%) | 624,017 (56.1%) | 29,104 (62.5%) | 241,219 (51.6%) |
| 30-39 | 159,606 (15.6%) | 796,251 (16.2%) | 154,316 (15.6%) | 769,784 (16.2%) | 5,290 (15.4%) | 26,467 (16.2%) | 134,412 (16.9%) | 546,806 (17.5%) | 17,030 (9.8%) | 141,294 (12.7%) | 4,870 (10.5%) | 69,052 (14.8%) |
| 40-59 | 261,153 (25.5%) | 1,274,882 (26.0%) | 252,675 (25.5%) | 1,234,046 (26.0%) | 8,478 (24.7%) | 40,836 (25.0%) | 231,693 (29.2%) | 977,432 (31.4%) | 18,475 (10.6%) | 164,788 (14.8%) | 4,385 (9.4%) | 74,294 (15.9%) |
| 60+ | 276,164 (27.0%) | 1,270,778 (25.9%) | 268,263 (27.1%) | 1,234,619 (26.0%) | 7,901 (23.1%) | 36,159 (22.1%) | 236,725 (29.9%) | 950,050 (30.5%) | 25,829 (14.8%) | 181,774 (16.3%) | 8,194 (17.6%) | 83,229 (17.8%) |
| **Quintiles of Carstairs deprivation index c** |  |  |  |  |  |  |  |  |  |  |  |  |
| 1 (least deprived) | 128,266 (12.5%) | 612,978 (12.5%) | 128,266 (13.0%) | 612,978 (12.9%) | n/a | n/a | 102,526 (12.9%) | 398,132 (12.8%) | 22,230 (12.8%) | 145,675 (13.1%) | 5,603 (12.0%) | 61,009 (13.0%) |
| 2 | 202,153 (19.8%) | 969,896 (19.8%) | 202,153 (20.4%) | 969,896 (20.4%) | n/a | n/a | 161,206 (20.3%) | 635,201 (20.4%) | 35,344 (20.3%) | 219,724 (19.8%) | 9,738 (20.9%) | 93,899 (20.1%) |
| 3 | 211,882 (20.7%) | 1,021,847 (20.8%) | 211,882 (21.4%) | 1,021,847 (21.5%) | n/a | n/a | 170,160 (21.5%) | 674,894 (21.6%) | 36,022 (20.7%) | 228,723 (20.6%) | 9,693 (20.8%) | 94,576 (20.2%) |
| 4 | 247,290 (24.2%) | 1,185,082 (24.1%) | 247,290 (25.0%) | 1,185,082 (25.0%) | n/a | n/a | 199,480 (25.2%) | 787,666 (25.3%) | 41,258 (23.7%) | 261,566 (23.5%) | 11,278 (24.2%) | 110,275 (23.6%) |
| 5 (most deprived) | 199,370 (19.5%) | 954,675 (19.5%) | 199,370 (20.2%) | 954,675 (20.1%) | n/a | n/a | 159,658 (20.1%) | 621,638 (19.9%) | 34,268 (19.7%) | 222,369 (20.0%) | 9,358 (20.1%) | 95,731 (20.5%) |
| Missing | 34,271 (3.3%) | 163,581 (3.3%) | n/a | n/a | n/a | n/a | n/a | n/a | 5,066 (2.9%) | 33,816 (3.0%) | 883 (1.9%) | 12,304 (2.6%) |
| **Body mass index (kg/m2) d** |  |  |  |  |  |  |  |  |  |  |  |  |
| Underweight (<18.5) | 25,486 (2.5%) | 122,658 (2.5%) | 24,560 (2.5%) | 118,484 (2.5%) | 926 (2.7%) | 4,174 (2.6%) | 22,842 (2.9%) | 89,668 (2.9%) | n/a | n/a | 802 (1.7%) | 5,834 (1.2%) |
| Normal (18.5-24.9) | 368,313 (36.0%) | 1,680,277 (34.2%) | 355,350 (35.9%) | 1,622,355 (34.2%) | 12,963 (37.8%) | 57,922 (35.4%) | 341,639 (43.1%) | 1,346,622 (43.2%) | n/a | n/a | 7,290 (15.7%) | 52,851 (11.3%) |
| Overweight (25-29.9) | 274,062 (26.8%) | 1,219,689 (24.9%) | 264,786 (26.8%) | 1,178,048 (24.8%) | 9,276 (27.1%) | 41,641 (25.5%) | 257,644 (32.5%) | 1,023,867 (32.8%) | n/a | n/a | 3,570 (7.7%) | 24,432 (5.2%) |
| Obese (30+) | 181,183 (17.7%) | 773,562 (15.8%) | 175,143 (17.7%) | 747,534 (15.8%) | 6,040 (17.6%) | 26,028 (15.9%) | 170,905 (21.6%) | 657,374 (21.1%) | n/a | n/a | 1,855 (4.0%) | 11,588 (2.5%) |
| Missing | 174,188 (17.0%) | 1,111,873 (22.7%) | 169,122 (17.1%) | 1,078,057 (22.7%) | 5,066 (14.8%) | 33,816 (20.7%) | n/a | n/a | n/a | n/a | 33,036 (71.0%) | 373,089 (79.8%) |
| **Smoking statusd** |  |  |  |  |  |  |  |  |  |  |  |  |
| Non-smoker | 529,881 (51.8%) | 2,433,856 (49.6%) | 511,040 (51.7%) | 2,348,215 (49.5%) | 18,841 (55.0%) | 85,641 (52.4%) | 414,960 (52.3%) | 1,640,634 (52.6%) | 90,716 (52.1%) | 460,418 (41.4%) | n/a | n/a |
| Current or ex-smoker | 446,798 (43.7%) | 2,006,409 (40.9%) | 432,251 (43.7%) | 1,940,773 (40.9%) | 14,547 (42.4%) | 65,636 (40.1%) | 378,070 (47.7%) | 1,476,897 (47.4%) | 50,436 (29.0%) | 278,366 (25.0%) | n/a | n/a |
| Missing | 46,553 (4.5%) | 467,794 (9.5%) | 45,670 (4.6%) | 455,490 (9.6%) | 883 (2.6%) | 12,304 (7.5%) | n/a | n/a | 33,036 (19.0%) | 373,089 (33.6%) | n/a | n/a |
| **Harmful alcohol use (%) d** | 73,353 (7.2%) | 294,033 (6.0%) | 70,678 (7.1%) | 283,467 (6.0%) | 2,675 (7.8%) | 10,566 (6.5%) | 64,307 (8.1%) | 229,582 (7.4%) | 5,508 (3.2%) | 27,657 (2.5%) | 882 (1.9%) | 5,232 (1.1%) |
| **Sleep problems (%) d** | 278,516 (27.2%) | 877,318 (17.9%) | 264,911 (26.8%) | 831,318 (17.5%) | 13,605 (39.7%) | 46,000 (28.1%) | 227,009 (28.6%) | 631,574 (20.3%) | 33,158 (19.0%) | 113,444 (10.2%) | 7,093 (15.2%) | 28,343 (6.1%) |
| **Ethnicity** |  |  |  |  |  |  |  |  |  |  |  |  |
| White | 387,082 (37.8%) | 1,783,293 (36.3%) | 382,415 (38.7%) | 1,757,101 (37.0%) | 4,667 (13.6%) | 26,192 (16.0%) | 333,321 (42.0%) | 1,330,439 (42.7%) | 43,974 (25.2%) | 254,056 (22.8%) | 4,393 (9.4%) | 38,767 (8.3%) |
| South Asian | 25,119 (2.5%) | 97,603 (2.0%) | 25,062 (2.5%) | 97,204 (2.0%) | 57 (0.2%) | 399 (0.2%) | 21,805 (2.7%) | 71,128 (2.3%) | 2,922 (1.7%) | 16,309 (1.5%) | 343 (0.7%) | 3,142 (0.7%) |
| Black | 10,964 (1.1%) | 54,725 (1.1%) | 10,951 (1.1%) | 54,564 (1.2%) | 13 (0.0%) | 161 (0.1%) | 9,133 (1.2%) | 39,237 (1.3%) | 1,666 (1.0%) | 9,895 (0.9%) | 268 (0.6%) | 2,237 (0.5%) |
| Other | 7,797 (0.8%) | 44,126 (0.9%) | 7,690 (0.8%) | 43,435 (0.9%) | 107 (0.3%) | 691 (0.4%) | 6,606 (0.8%) | 29,367 (0.9%) | 1,006 (0.6%) | 9,404 (0.8%) | 115 (0.2%) | 2,258 (0.5%) |
| Mixed | 4,013 (0.4%) | 18,864 (0.4%) | 3,998 (0.4%) | 18,739 (0.4%) | 15 (0.0%) | 125 (0.1%) | 3,232 (0.4%) | 12,290 (0.4%) | 690 (0.4%) | 4,163 (0.4%) | 78 (0.2%) | 804 (0.2%) |
| Not stated or missing | 588,257 (57.5%) | 2,909,448 (59.3%) | 558,845 (56.5%) | 2,773,435 (58.5%) | 29,412 (85.8%) | 136,013 (83.1%) | 418,933 (52.8%) | 1,635,070 (52.4%) | 123,930 (71.1%) | 818,046 (73.6%) | 41,356 (88.8%) | 420,586 (89.9%) |
| **Charlson comorbidity index d** |  |  |  |  |  |  |  |  |  |  |  |  |
| Low (0) | 636,704 (62.2%) | 3,605,319 (73.5%) | 614,489 (62.1%) | 3,484,377 (73.4%) | 22,215 (64.8%) | 120,942 (73.9%) | 486,457 (61.3%) | 2,197,116 (70.5%) | 115,578 (66.4%) | 908,292 (81.7%) | 33,569 (72.1%) | 409,417 (87.5%) |
| Moderate (1-2) | 340,946 (33.3%) | 1,103,589 (22.5%) | 330,211 (33.4%) | 1,067,282 (22.5%) | 10,735 (31.3%) | 36,307 (22.2%) | 268,063 (33.8%) | 766,598 (24.6%) | 53,849 (30.9%) | 181,078 (16.3%) | 11,552 (24.8%) | 51,716 (11.1%) |
| Severe (3 or more) | 45,582 (4.5%) | 199,151 (4.1%) | 44,261 (4.5%) | 192,819 (4.1%) | 1,321 (3.9%) | 6,332 (3.9%) | 38,510 (4.9%) | 153,817 (4.9%) | 4,761 (2.7%) | 22,503 (2.0%) | 1,432 (3.1%) | 6,661 (1.4%) |

Abbreviations: IQR – Interquartile range

Individuals can contribute data as both eczema exposed and unexposed. Therefore, numbers of exposed/unexposed do not total the whole cohort, as individuals may be included in more than one column.

a Follow-up based on censoring at the earliest of: death, no longer registered with practice, practice no longer contributing to CPRD, or severe mental illness diagnosis

b Age at index date

c Carstairs deprivation index based on practice-level data (from 2011).

d Based on records closest to index date.

|  | | |  | |  |  |  |  |  |  |
| --- | --- | --- | --- | --- | --- | --- | --- | --- | --- | --- |
|  |  |  | |
|  | | |  | |  |  |  |  |  |  |
|  | | |  | |  |  |  |  |  |  |
|  | | |  | |  |  |  |  |  |  |

Table S4: Characteristics of the psoriasis study population at cohort entry, for: the overall cohort, individuals included in the model additionally adjusting for potential confounders (i.e., individuals with no missing Carstairs deprivation data), individuals with missing Carstairs data, individuals included in the model additionally adjusting for potential mediators (i.e., individuals with no missing BMI or smoking status data), and for individuals with missing BMI or smoking status

|  | **Overall cohort** | | **Sample included in model adjusting for potential confounders** | | **Individuals with missing Carstairs data** | | **Sample included in model adjusting for potential mediators** | | **Individuals with missing BMI data** | | **Individuals with missing smoking data** | |
| --- | --- | --- | --- | --- | --- | --- | --- | --- | --- | --- | --- | --- |
|  | **With psoriasis** | **Without psoriasis** | **With psoriasis** | **Without psoriasis** | **With psoriasis** | **Without psoriasis** | **With psoriasis** | **Without psoriasis** | **With psoriasis** | **Without psoriasis** | **With psoriasis** | **Without psoriasis** |
| **Number** | 363,210 | 1,801,875 | 346,659 | 1,719,842 | 16,551 | 82,033 | 286,396 | 1,179,789 | 54,077 | 344,186 | 16,943 | 146,512 |
| **Follow-up a** |  |  |  |  |  |  |  |  |  |  |  |  |
| Total person-years | 2,680,394 | 13,246,255 | 2,523,477 | 12,491,309 | 156,916 | 754,946 | 2,218,106 | 9,176,327 | 286,304 | 1,925,031 | 56,622 | 650,338 |
| Median (IQR) duration of follow-up (years) | 5.9 (2.3-11.5) | 5.9 (2.4-11.4) | 5.8 (2.3-11.4) | 5.8 (2.4-11.3) | 8.6 (3.7-15.1) | 8.2 (3.5-14.7) | 6.4 (2.6-12.1) | 6.5 (2.7-12.0) | 3.6 (1.4-7.8) | 4.1 (1.6-8.4) | 2.2 (0.9-4.5) | 3.0 (1.2-6.3) |
| **Sex** |  |  |  |  |  |  |  |  |  |  |  |  |
| Female (%) | 189,511 (52.2%) | 940,489 (52.2%) | 180,662 (52.1%) | 896,606 (52.1%) | 8,849 (53.5%) | 43,883 (53.5%) | 156,320 (54.6%) | 671,945 (57.0%) | 21,687 (40.1%) | 131,202 (38.1%) | 6,983 (41.2%) | 55,516 (37.9%) |
| **Age (years) b** |  |  |  |  |  |  |  |  |  |  |  |  |
| 18-29 | 78,207 (21.5%) | 389,718 (21.6%) | 73,595 (21.2%) | 366,735 (21.3%) | 4,612 (27.9%) | 22,983 (28.0%) | 48,570 (17.0%) | 171,588 (14.5%) | 22,735 (42.0%) | 140,011 (40.7%) | 6,585 (38.9%) | 52,013 (35.5%) |
| 30-39 | 70,325 (19.4%) | 349,056 (19.4%) | 67,057 (19.3%) | 332,830 (19.4%) | 3,268 (19.7%) | 16,226 (19.8%) | 55,244 (19.3%) | 220,466 (18.7%) | 10,347 (19.1%) | 68,175 (19.8%) | 3,546 (20.9%) | 31,992 (21.8%) |
| 40-59 | 119,899 (33.0%) | 593,805 (33.0%) | 114,764 (33.1%) | 568,432 (33.1%) | 5,135 (31.0%) | 25,373 (30.9%) | 101,938 (35.6%) | 435,073 (36.9%) | 11,423 (21.1%) | 79,002 (23.0%) | 3,536 (20.9%) | 36,022 (24.6%) |
| 60+ | 94,779 (26.1%) | 469,296 (26.0%) | 91,243 (26.3%) | 451,845 (26.3%) | 3,536 (21.4%) | 17,451 (21.3%) | 80,644 (28.2%) | 352,662 (29.9%) | 9,572 (17.7%) | 56,998 (16.6%) | 3,276 (19.3%) | 26,485 (18.1%) |
| **Quintiles of Carstairs deprivation index c** |  |  |  |  |  |  |  |  |  |  |  |  |
| 1 (least deprived) | 43,233 (11.9%) | 214,804 (11.9%) | 43,233 (12.5%) | 214,804 (12.5%) | n/a | n/a | 35,515 (12.4%) | 145,639 (12.3%) | 6,720 (12.4%) | 42,483 (12.3%) | 2,012 (11.9%) | 17,709 (12.1%) |
| 2 | 68,391 (18.8%) | 339,661 (18.9%) | 68,391 (19.7%) | 339,661 (19.7%) | n/a | n/a | 56,581 (19.8%) | 233,092 (19.8%) | 10,095 (18.7%) | 64,768 (18.8%) | 3,244 (19.1%) | 27,599 (18.8%) |
| 3 | 76,487 (21.1%) | 379,580 (21.1%) | 76,487 (22.1%) | 379,580 (22.1%) | n/a | n/a | 63,150 (22.0%) | 260,685 (22.1%) | 11,544 (21.3%) | 71,673 (20.8%) | 3,692 (21.8%) | 30,587 (20.9%) |
| 4 | 88,207 (24.3%) | 437,347 (24.3%) | 88,207 (25.4%) | 437,347 (25.4%) | n/a | n/a | 73,043 (25.5%) | 302,865 (25.7%) | 13,160 (24.3%) | 82,119 (23.9%) | 4,154 (24.5%) | 34,993 (23.9%) |
| 5 (most deprived) | 70,341 (19.4%) | 348,450 (19.3%) | 70,341 (20.3%) | 348,450 (20.3%) | n/a | n/a | 58,107 (20.3%) | 237,508 (20.1%) | 10,598 (19.6%) | 69,546 (20.2%) | 3,396 (20.0%) | 30,318 (20.7%) |
| Missing | 16,551 (4.6%) | 82,033 (4.6%) | 0 (0.0%) | 0 (0.0%) | n/a | n/a | n/a | n/a | 1,960 (3.6%) | 13,597 (4.0%) | 445 (2.6%) | 5,306 (3.6%) |
| **Body mass index (kg/m2) d** |  |  |  |  |  |  |  |  |  |  |  |  |
| Underweight (<18.5) | 6,767 (1.9%) | 37,208 (2.1%) | 6,432 (1.9%) | 35,342 (2.1%) | 335 (2.0%) | 1,866 (2.3%) | 6,078 (2.1%) | 27,771 (2.4%) | n/a | n/a | 248 (1.5%) | 1,510 (1.0%) |
| Normal (18.5-24.9) | 118,438 (32.6%) | 610,457 (33.9%) | 112,761 (32.5%) | 581,614 (33.8%) | 5,677 (34.3%) | 28,843 (35.2%) | 108,684 (37.9%) | 484,831 (41.1%) | n/a | n/a | 3,186 (18.8%) | 16,466 (11.2%) |
| Overweight (25-29.9) | 106,417 (29.3%) | 497,192 (27.6%) | 101,454 (29.3%) | 473,882 (27.6%) | 4,963 (30.0%) | 23,310 (28.4%) | 99,097 (34.6%) | 407,332 (34.5%) | n/a | n/a | 1,917 (11.3%) | 8,644 (5.9%) |
| Obese (30+) | 77,511 (21.3%) | 312,832 (17.4%) | 73,895 (21.3%) | 298,415 (17.4%) | 3,616 (21.8%) | 14,417 (17.6%) | 72,537 (25.3%) | 259,855 (22.0%) | n/a | n/a | 1,006 (5.9%) | 3,829 (2.6%) |
| Missing | 54,077 (14.9%) | 344,186 (19.1%) | 52,117 (15.0%) | 330,589 (19.2%) | 1,960 (11.8%) | 13,597 (16.6%) | n/a | n/a | n/a | n/a | 10,586 (62.5%) | 116,063 (79.2%) |
| **Smoking statusd** |  |  |  |  |  |  |  |  |  |  |  |  |
| Non-smoker | 149,937 (41.3%) | 866,540 (48.1%) | 142,505 (41.1%) | 826,134 (48.0%) | 7,432 (44.9%) | 40,406 (49.3%) | 121,192 (42.3%) | 602,251 (51.0%) | 21,254 (39.3%) | 131,380 (38.2%) | n/a | n/a |
| Current or ex-smoker | 196,330 (54.1%) | 788,823 (43.8%) | 187,656 (54.1%) | 752,502 (43.8%) | 8,674 (52.4%) | 36,321 (44.3%) | 165,204 (57.7%) | 577,538 (49.0%) | 22,237 (41.1%) | 96,743 (28.1%) | n/a | n/a |
| Missing | 16,943 (4.7%) | 146,512 (8.1%) | 16,498 (4.8%) | 141,206 (8.2%) | 445 (2.7%) | 5,306 (6.5%) | n/a | n/a | 10,586 (19.6%) | 116,063 (33.7%) | n/a | n/a |
| **Harmful alcohol use (%) d** | 22,822 (6.3%) | 89,889 (5.0%) | 21,655 (6.2%) | 85,572 (5.0%) | 1,167 (7.1%) | 4,317 (5.3%) | 19,881 (6.9%) | 69,793 (5.9%) | 1,632 (3.0%) | 6,774 (2.0%) | 276 (1.6%) | 1,123 (0.8%) |
| **Ethnicity** |  |  |  |  |  |  |  |  |  |  |  |  |
| White | 150,087 (41.3%) | 608,246 (33.8%) | 147,209 (42.5%) | 598,758 (34.8%) | 2,878 (17.4%) | 9,488 (11.6%) | 130,767 (45.7%) | 471,495 (40.0%) | 15,558 (28.8%) | 65,016 (18.9%) | 1,369 (8.1%) | 7,744 (5.3%) |
| South Asian | 4,799 (1.3%) | 24,687 (1.4%) | 4,779 (1.4%) | 24,582 (1.4%) | 20 (0.1%) | 105 (0.1%) | 4,235 (1.5%) | 18,851 (1.6%) | 506 (0.9%) | 3,220 (0.9%) | 51 (0.3%) | 565 (0.4%) |
| Black | 1,071 (0.3%) | 13,520 (0.8%) | 1,065 (0.3%) | 13,477 (0.8%) | 6 (0.0%) | 43 (0.1%) | 919 (0.3%) | 10,388 (0.9%) | 131 (0.2%) | 1,782 (0.5%) | 20 (0.1%) | 348 (0.2%) |
| Other | 1,811 (0.5%) | 11,397 (0.6%) | 1,778 (0.5%) | 11,210 (0.7%) | 33 (0.2%) | 187 (0.2%) | 1,536 (0.5%) | 8,225 (0.7%) | 223 (0.4%) | 1,832 (0.5%) | 32 (0.2%) | 352 (0.2%) |
| Mixed | 816 (0.2%) | 4,398 (0.2%) | 813 (0.2%) | 4,359 (0.3%) | 3 (0.0%) | 39 (0.0%) | 696 (0.2%) | 3,220 (0.3%) | 109 (0.2%) | 659 (0.2%) | 9 (0.1%) | 106 (0.1%) |
| Not stated or missing | 204,626 (56.3%) | 1,139,627 (63.2%) | 191,015 (55.1%) | 1,067,456 (62.1%) | 13,611 (82.2%) | 72,171 (88.0%) | 148,243 (51.8%) | 667,610 (56.6%) | 37,550 (69.4%) | 271,677 (78.9%) | 15,462 (91.3%) | 137,397 (93.8%) |
| **Charlson comorbidity index d** |  |  |  |  |  |  |  |  |  |  |  |  |
| Low (0) | 252,430 (69.5%) | 1,308,427 (72.6%) | 240,662 (69.4%) | 1,248,116 (72.6%) | 11,768 (71.1%) | 60,311 (73.5%) | 194,985 (68.1%) | 822,626 (69.7%) | 41,021 (75.9%) | 284,310 (82.6%) | 13,329 (78.7%) | 129,301 (88.3%) |
| Moderate (1-2) | 94,223 (25.9%) | 421,230 (23.4%) | 90,148 (26.0%) | 402,585 (23.4%) | 4,075 (24.6%) | 18,645 (22.7%) | 77,446 (27.0%) | 300,906 (25.5%) | 11,326 (20.9%) | 54,069 (15.7%) | 3,101 (18.3%) | 15,334 (10.5%) |
| Severe (3 or more) | 16,557 (4.6%) | 72,218 (4.0%) | 15,849 (4.6%) | 69,141 (4.0%) | 708 (4.3%) | 3,077 (3.8%) | 13,965 (4.9%) | 56,257 (4.8%) | 1,730 (3.2%) | 5,807 (1.7%) | 513 (3.0%) | 1,877 (1.3%) |

Abbreviations: IQR – Interquartile range

Individuals can contribute data as both psoriasis exposed and unexposed. Therefore, numbers of exposed/unexposed do not total the whole cohort, as individuals may be included in more than one column.

a Follow-up based on censoring at the earliest of: death, no longer registered with practice, practice no longer contributing to CPRD, or severe mental illness diagnosis

b Age at index date

c Carstairs deprivation index based on practice-level data (from 2011).

d Based on records closest to index date.

|  | | |  | |  |  |  |  |  |  |
| --- | --- | --- | --- | --- | --- | --- | --- | --- | --- | --- |
|  |  |  | |
|  | | |  | |  |  |  |  |  |  |
|  | | |  | |  |  |  |  |  |  |
|  | | |  | |  |  |  |  |  |  |

Table S5: Absolute incidence rates and rate differences of severe mental illness in atopic eczema and psoriasis cohorts

| **Model** | **Cohort** | **HR (95% CI) in exposed c** | **Number of SMI events in exposed** | **Absolute rate in exposed (per 100,000 PYAR)** | **Estimated absolute rate in unexposed (per 100,000 PYAR)** | **Absolute rate difference (per 100,000 PYAR)** |
| --- | --- | --- | --- | --- | --- | --- |
| Minimally adjusted | Atopic eczema | 1.16 (1.12, 1.21) | 3,150 | 45 | 39 | 6 |
|  | Psoriasis | 1.27 (1.1.9, 1.36) | 1,191 | 44 | 35 | 9 |
| Confounder-adjusted a | Atopic eczema | 1.17 (1.12, 1.22) | 3,012 | 45 | 39 | 6 |
|  | Psoriasis | 1.26 (1.18, 1.35) | 1,107 | 44 | 35 | 9 |
| Mediator-adjusted b | Atopic eczema | 1.01 (0.96, 1.07) | 2,632 | 45 | 45 | 0 |
|  | Psoriasis | 1.13 (1.04, 1.22) | 990 | 45 | 40 | 5 |

Abbreviations: CI – Confidence Interval; HR – Hazard Ratio; PYAR – Person years at risk

a Adjusted for calendar period and quintiles of Carstairs deprivation index (using 2011 census data)

b Atopic eczema cohort is further adjusted for comorbidities (using the Charlson comorbidity index), sleep problems, smoking status, high dose glucocorticoid use, harmful alcohol use and body mass index. Psoriasis cohort is further adjusted for comorbidities (using the Charlson comorbidity index), smoking status, harmful alcohol use and body mass index.

c Estimated hazard ratios from Cox regression with current age as underlying timescale, stratified by matched set (matched on age at cohort entry, sex, general practice, and date at cohort entry)

Table S6: HRs (95% CI) for the association between atopic eczema or psoriasis severity and severe mental illness. Fitted to adults with complete data for all variables included in each model and from valid matched sets a

| **Cohort** | **Minimally adjusted** | | | | **Confounder adjusted b** | | | | **Additionally adjusted for potential mediators c** | | | |
| --- | --- | --- | --- | --- | --- | --- | --- | --- | --- | --- | --- | --- |
|  | **Number** | **PYAR** | **Events** | **HR (95% CI) d** | **Number** | **PYAR** | **Events** | **HR (95% CI) d** | **Number** | **PYAR** | **Events** | **HR (95% CI) d** |
| **Atopic eczema** |  |  |  |  |  |  |  |  |  |  |  |  |
| Unexposed | 4,908,059 | 30,935,170 | 11,999 | 1 (reference) | 4,744,478 | 29,565,265 | 11,428 | 1 (reference) | 3,117,531 | 21,282,283 | 8,131 | 1 (reference) |
| Mild eczema | 791,317 | 4,799,119 | 1,875 | 0.98 (0.93, 1.03) | 765,883 | 4,595,659 | 1,796 | 0.98 (0.93, 1.04) | 597,830 | 3,887,048 | 1,542 | 0.82 (0.77, 0.88) |
| Moderate eczema | 246,592 | 2,034,775 | 1,181 | 1.61 (1.50, 1.73) | 237,363 | 1,939,343 | 1,127 | 1.61 (1.50, 1.73) | 209,075 | 1,764,883 | 1,008 | 1.38 (1.26, 1.51) |
| Severe eczema | 18,724 | 161,998 | 94 | 1.56 (1.21, 2.01) | 17,788 | 151,451 | 89 | 1.57 (1.21, 2.04) | 15,473 | 137,082 | 82 | 1.16 (0.84, 1.60) |
| **Psoriasis** |  |  |  |  |  |  |  |  |  |  |  |  |
| Unexposed | 1,801,875 | 13,246,255 | 4,598 | 1 (reference) | 1,719,842 | 12,491,309 | 4,319 | 1 (reference) | 1,179,789 | 9,176,327 | 3,252 | 1 (reference) |
| Mild psoriasis | 349,649 | 2,529,032 | 1,147 | 1.29 (1.21, 1.38) | 334,121 | 2,385,265 | 1,064 | 1.28 (1.19, 1.37) | 274,959 | 2,089,482 | 953 | 1.16 (1.07, 1.25) |
| Moderate-to-severe psoriasis | 13,976 | 151,362 | 44 | 0.90 (0.65, 1.25) | 12,922 | 138,213 | 43 | 0.97 (0.69, 1.35) | 11,802 | 128,625 | 37 | 0.81 (0.56, 1.18) |

Abbreviations: CI – Confidence Interval; HR – Hazard Ratio; PYAR – Person years at risk

a Matched sets including one exposed patient and at least one unexposed patient.

b Adjusted for calendar period and quintiles of Carstairs deprivation index (using 2011 census data)

c Atopic eczema cohort is further adjusted for comorbidities (using the Charlson comorbidity index), sleep problems, smoking status, high dose glucocorticoid use, harmful alcohol use and body mass index. Adjusted for comorbidities, sleep problems, smoking status, high dose glucocorticoid use, harmful alcohol use and BMI. Psoriasis cohort is further adjusted for comorbidities (using the Charlson comorbidity index), smoking status, harmful alcohol use and body mass index.

d Estimated hazard ratios from Cox regression with current age as underlying timescale, stratified by matched set (matched on age at cohort entry, sex, general practice, and date at cohort entry)

Table S7: Adjusted hazard ratios (95% CIs) for the association between atopic eczema or psoriasis and severe mental illness, stratified by sex, age, and calendar period (adjusted for calendar period and Carstairs deprivation).

| **Variable** | **Atopic eczema cohort** | | | | | **Psoriasis cohort** | | | | |
| --- | --- | --- | --- | --- | --- | --- | --- | --- | --- | --- |
|  | **Number of individuals** | **PYAR** | **Events** | **HR (95% CI)** | **P value** | **Number of individuals** | **PYAR** | **Events** | **HR (95% CI)** | **P value** |
| **Sex** |  |  |  |  | 0.26 |  |  |  |  | 0.26 |
| *Males* |  |  |  |  |  |  |  |  |  |  |
| Unexposed | 1,995,311 | 12,458,113 | 4,653 | 1 (ref) |  | 823,236 | 6,011,033 | 1,948 | 1 (ref) |  |
| Exposed | 412,218 | 2,726,164 | 1,128 | 1.13 (1.06, 1.21) |  | 165,997 | 1,217,725 | 513 | 1.32 (1.19, 1.46) |  |
| *Females* |  |  |  |  |  |  |  |  |  |  |
| Exposed | 2,749,167 | 17,107,152 | 6,775 | 1 (ref) |  | 896,606 | 6,480,277 | 2,371 | 1 (ref) |  |
| Unexposed | 576,743 | 3,960,289 | 1,884 | 1.19 (1.13, 1.25) |  | 180,662 | 1,305,753 | 594 | 1.21 (1.11, 1.33) |  |
| **Age** |  |  |  |  | <0.01 |  |  |  |  | 0.01 |
| *18-29* |  |  |  |  |  |  |  |  |  |  |
| Unexposed | 1,506,029 | 7,474,646 | 3,965 | 1 (ref) |  | 366,735 | 2,188,125 | 1,031 | 1 (ref) |  |
| Exposed | 313,707 | 1,723,120 | 965 | 1.05 (0.98, 1.13) |  | 73,595 | 439,890 | 286 | 1.46 (1.27, 1.68) |  |
| *30-39* |  |  |  |  |  |  |  |  |  |  |
| Unexposed | 769,784 | 5,105,659 | 2,009 | 1 (ref) |  | 332,830 | 2,447,829 | 983 | 1 (ref) |  |
| Exposed | 154,316 | 1,137,985 | 557 | 1.23 (1.11, 1.35) |  | 67,057 | 499,914 | 221 | 1.10 (0.95, 1.28) |  |
| *40-59* |  |  |  |  |  |  |  |  |  |  |
| Unexposed | 1,234,046 | 9,261,761 | 2,721 | 1 (ref) |  | 568,432 | 4,716,350 | 1,329 | 1 (ref) |  |
| Exposed | 252,675 | 2,043,721 | 818 | 1.37 (1.26, 1.48) |  | 114,764 | 952,963 | 356 | 1.30 (1.15, 1.47) |  |
| *60+* |  |  |  |  |  |  |  |  |  |  |
| Unexposed | 1,234,619 | 7,723,198 | 2,733 | 1 (ref) |  | 451,845 | 3,139,006 | 976 | 1 (ref) |  |
| Exposed | 268,263 | 1,781,627 | 672 | 1.05 (0.96, 1.15) |  | 91,243 | 630,710 | 244 | 1.17 (1.01, 1.36) |  |
| **Calendar period** |  |  |  |  | 0.86 |  |  |  |  |  |
| *1997-2003* |  |  |  |  |  |  |  |  |  |  |
| Unexposed | 1,556,548 | 5,226,532 | 2,214 | 1 (ref) |  | 654,477 | 2,213,622 | 854 | 1 (ref) | 0.01 |
| Exposed | 321,591 | 1,122,582 | 550 | 1.17 (1.06, 1.29) |  | 131,819 | 453,126 | 188 | 1.04 (0.89, 1.23) |  |
| *2004-2009* |  |  |  |  |  |  |  |  |  |  |
| Unexposed | 2,516,467 | 8,911,202 | 3,248 | 1 (ref) |  | 996,336 | 3,881,467 | 1,290 | 1 (ref) |  |
| Exposed | 538,913 | 2,009,886 | 863 | 1.19 (1.10, 1.29) |  | 202,899 | 793,958 | 320 | 1.19 (1.05, 1.35) |  |
| *2010-2015* |  |  |  |  |  |  |  |  |  |  |
| Unexposed | 3,096,454 | 10,714,880 | 4,086 | 1 (ref) |  | 1,166,319 | 4,410,754 | 1,494 | 1 (ref) |  |
| Exposed | 682,304 | 2,473,959 | 1,083 | 1.14 (1.06, 1.22) |  | 236,097 | 886,218 | 421 | 1.45 (1.29, 1.63) |  |
| *2016-2020* |  |  |  |  |  |  |  |  |  |  |
| Unexposed | 1,892,797 | 4,712,650 | 1,880 | 1 (ref) |  | 751,484 | 1,985,466 | 681 | 1 (ref) |  |
| Exposed | 426,765 | 1,080,026 | 516 | 1.18 (1.06, 1.31) |  | 149,555 | 390,176 | 178 | 1.30 (1.09, 1.55) |  |

Abbreviations: CI – Confidence Interval; HR – Hazard Ratio; PYAR – Person years at risk

Table S8: Effects of individual mediators on the associations between atopic eczema or psoriasis and severe mental illness

|  | **Atopic eczema cohort** | | | | **Psoriasis cohort** | | | |
| --- | --- | --- | --- | --- | --- | --- | --- | --- |
|  | **Number of individuals** | **PYAR** | **Events** | **HR (95% CI)** | **Number of individuals** | **PYAR** | **Events** | **HR (95% CI)** |
| **Confounder adjusted model** | **988,961** | **6,686,453** | **3,012** | **1.17 (1.12, 1.22)** | **346,659** | **2,523,477** | **1,107** | **1.26 (1.18, 1.35)** |
| Further adjusted for: |  |  |  |  |  |  |  |  |
| Comorbidities | 988,961 | 6,686,453 | 3,012 | 1.14 (1.09, 1.19) | 346,659 | 2,523,477 | 1,107 | 1.25 (1.17, 1.34) |
| Sleep problems | 988,961 | 6,686,453 | 3,012 | 0.98 (0.94, 1.02) | n/a | n/a | n/a | n/a |
| Harmful alcohol use | 988,961 | 6,686,453 | 3,012 | 1.16 (1.11, 1.21) | 346,659 | 2,523,477 | 1,107 | 1.24 (1.15, 1.33) |
| High dose glucocorticoids | 988,961 | 6,686,453 | 3,012 | 1.19 (1.14, 1.24) | n/a | n/a | n/a | n/a |
| BMI | 807,637 | 5,839,813 | 2,671 | 1.13 (1.08, 1.19) | 292,881 | 2,240,474 | 1,003 | 1.20 (1.12, 1.30) |
| Smoking status | 940,567 | 6,542,904 | 2,935 | 1.13 (1.08, 1.18) | 329,959 | 2,467,245 | 1,085 | 1.17 (1.09, 1.26) |
| **Fully adjusted model (all mediators)** | **793,030** | **5,789,012** | **2,632** | **1.01 (0.96, 1.07)** | **286,396** | **2,218,106** | **990** | **1.13 (1.04, 1.22)** |

Abbreviations: CI – Confidence Interval; HR – Hazard Ratio; PYAR – Person years at risk
